# Supplementary material for: Calcineurin dephosphorylates Kelch-like 3, reversing phosphorylation by angiotensin II and regulating renal electrolyte handling
Source: PubMed Central journal article supplement — Proc Natl Acad Sci U S A. 2019 Feb 4;116(8):3155–60. doi: 10.1073/pnas.1817281116 (PMC6386661; doi:10.1073/pnas.1817281116), 2019-02-04
Supplement: pnas.1817281116.sapp.pdf [file pnas.1817281116.sapp.pdf]

Calcineurin dephosphorylates Kelch-like 3, reversing phosphorylation by  
angiotensin II and regulating renal electrolyte handling

Supplemental information

Kenichi Ishizawa<sup>a,\*</sup>, Qin Wang<sup>a,b,\*</sup>, Jinping Li<sup>a,c</sup>, Osamu Yamazaki<sup>a</sup>, Yoshifuru Tamura<sup>a</sup>,  
Yoshihide Fujigaki<sup>a</sup>, Shunya Uchida<sup>a</sup>, Richard P. Lifton<sup>d,1</sup>, Shigeru Shibata<sup>a,1</sup>

<sup>a</sup>Division of Nephrology, Department of Internal Medicine, Teikyo University School of  
Medicine, Tokyo 173-8605, Japan. <sup>b</sup>Department of Nephrology, the Second Affiliated  
Hospital of Harbin Medical University, Harbin 150081, China. <sup>c</sup>Department of  
Nephrology, Tianjin First Central Hospital, Tianjin 300000, China. <sup>d</sup>Laboratory of  
Human Genetics and Genomics, The Rockefeller University, New York, NY 10065,  
USA.

\*These authors equally contributed to the work.

<sup>1</sup>To whom correspondence may be addressed.

Email: rickl@rockefeller.edu or shigeru.shibata@med.teikyo-u.ac.jp

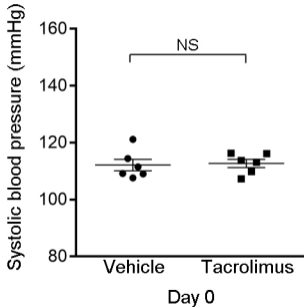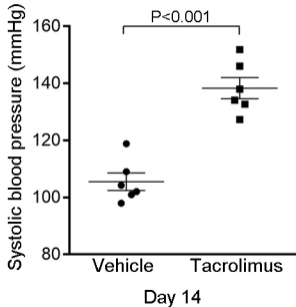

**Figure S1. Blood pressure in mice receiving tacrolimus and a high-salt diet.**

Systolic blood pressure was measured at day 0 and day 12 in mice receiving a high-salt diet and tacrolimus or vehicle.
